# Supplementary material for: A new strategy to effectively alleviate volume expansion and enhance the conductivity of hierarchical MnO@C nanocomposites for lithium ion batteries
Source: Royal Society of Chemistry journal article supplement (doi:10.1039/c7ta05986h), 2017-01-01
Supplement: c7ta05986h1.pdf [file c7ta05986h1.pdf]

## Supporting Information

### **A New Strategy to Effectively Alleviate Volume Expansion and Enhance Conductivity of Hierarchical MnO@C Nanocomposites for Lithium Ion Batteries**

Zhe Cui,<sup>a,b</sup> Qian Liu,<sup>c</sup> Chaoting Xu,<sup>a</sup> Rujia Zou<sup>a,\*</sup>, Jianhua Zhang,<sup>a</sup> Wenlong Zhang,<sup>a</sup>  
Guoqiang Guan,<sup>a</sup> Junqing Hu<sup>a,\*</sup> and Yangang Sun<sup>b,\*</sup>

<sup>a</sup> State Key Laboratory for Modification of Chemical Fibers and Polymer Materials,  
College of Materials Science and Engineering, Donghua University, Shanghai 201620,  
China

<sup>b</sup> College of Chemistry and Chemical Engineering, Shanghai University of  
Engineering Science, Shanghai 201620, China

<sup>c</sup> Department of Physics, Donghua University, Shanghai 201620, China

\*Corresponding author, E-mail: rjzou@dhu.edu.cn

hu.junqing@dhu.edu.cn

syg021@sues.edu.cn

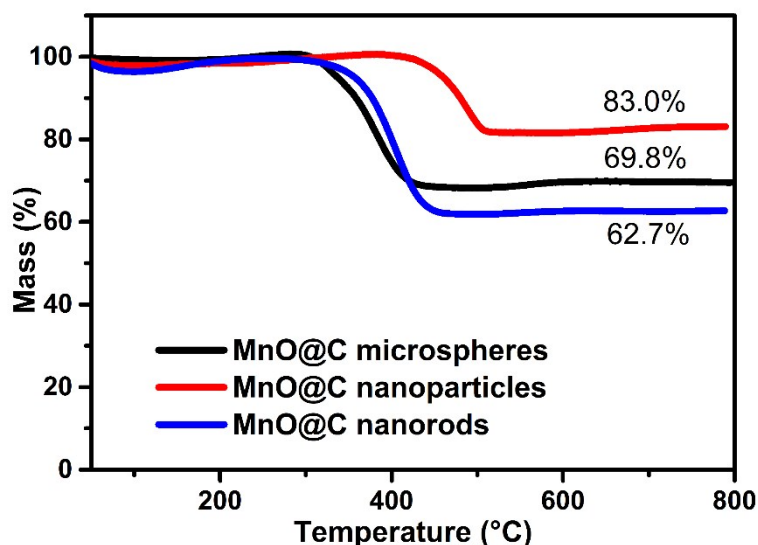

**Fig. S1** TG curves of MnO@C microspheres, MnO@C nanoparticles and MnO@C nanorods. In order to ascertain carbon content for MnO@C hierarchical microspheres, MnO@C nanorods and MnO@C nanoparticles, the TGA measurement has been conducted. As can be seen from Fig. 2, for MnO@C microspheres, the weight loss of  $\sim 0.86\%$  below  $200\text{ }^{\circ}\text{C}$  should be ascribed to the adsorption of water,<sup>1</sup> and the weight gain of  $\sim 1.8\%$  between  $200\sim 350\text{ }^{\circ}\text{C}$  is due to the slightly oxidation of MnO to  $\text{Mn}_2\text{O}_3$ .<sup>2</sup> Subsequently, the huge weight loss of  $32.44\%$  is mainly attributed to the combustion of carbon to  $\text{CO}_2$  and partial oxidation of MnO into  $\text{Mn}_2\text{O}_3$ .<sup>2</sup> Finally, it can be observed that after  $500\text{ }^{\circ}\text{C}$ , the weight gains of  $\sim 1.5\%$  and remains no change until  $800\text{ }^{\circ}\text{C}$ , indicating the entirely oxidation of MnO to  $\text{Mn}_2\text{O}_3$ .<sup>3</sup> According to previous reports,<sup>4,5,6</sup> MnO transforms to  $\text{Mn}_2\text{O}_3$  after heating to  $1050\text{ }^{\circ}\text{C}$  in an oxygen atmosphere. Therefore, it is believable that the final weight of  $\sim 69.8\%$  is entirely corresponding to  $\text{Mn}_2\text{O}_3$  transformed from MnO, which suggests that the original MnO is calculated to  $\sim 62.7\%$ , and the carbon content should be  $\sim 37.3\%$ . The carbon content is approximately comparable to that of other MnO/C composition derived from Mn-MOF.<sup>1,7,8</sup> Similarly, the carbon content of MnO@C nanoparticles and MnO@C nanorods is calculated to  $\sim 26.4\%$  and  $\sim 43.7\%$ , respectively.

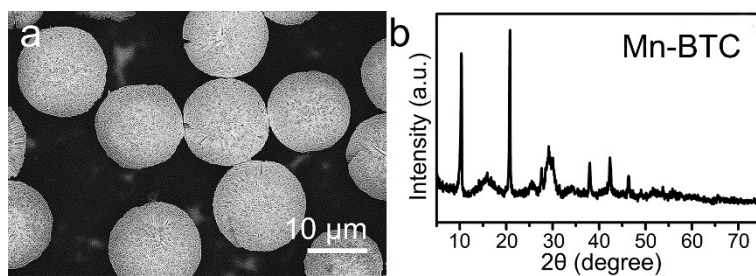

**Fig. S2** a) The low magnification SEM image. b) XRD pattern of Mn-BTC.

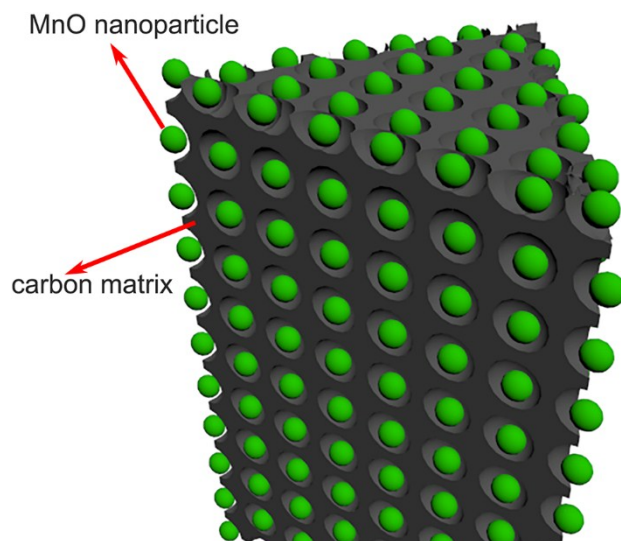

**Fig. S3** The schematic drawing for inner structure of single nanorod in MnO@C microsphere.

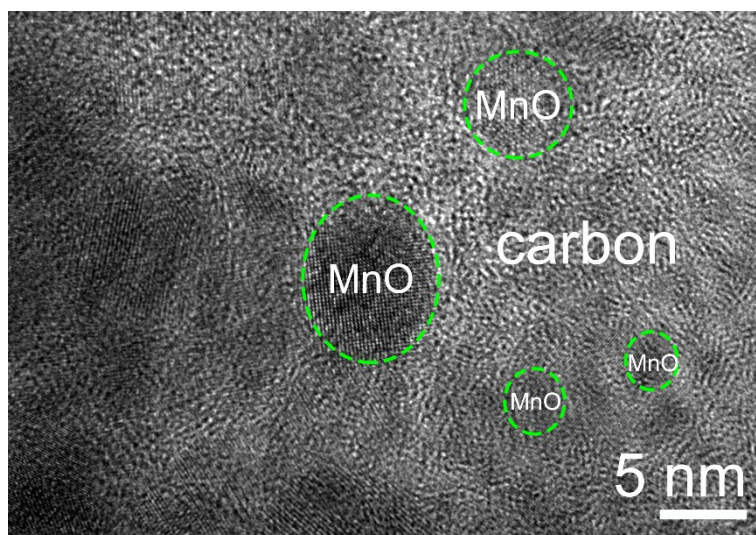

**Fig. S4** The HRTEM image of MnO@C microsphere taken from the middle area of single nanorod.

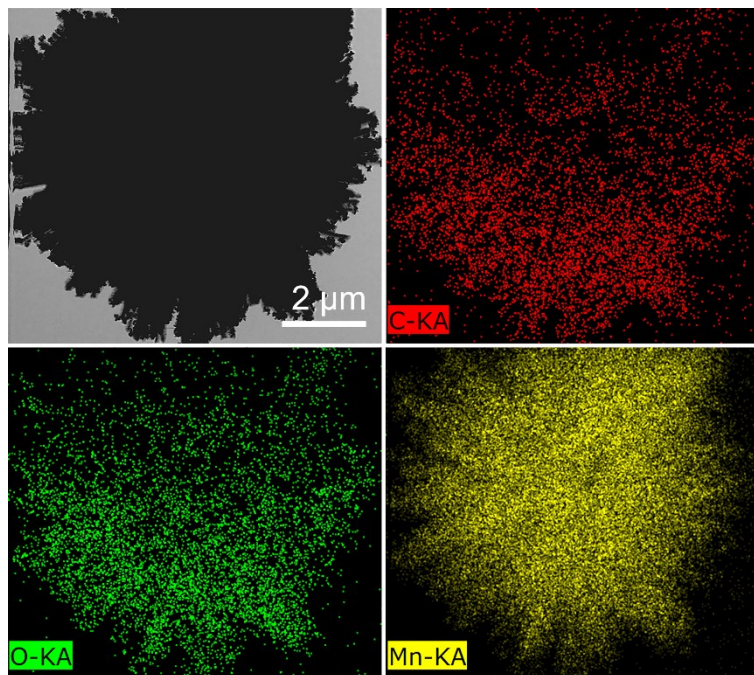

**Fig. S5** EDS mapping images of as-prepared MnO@C microsphere.

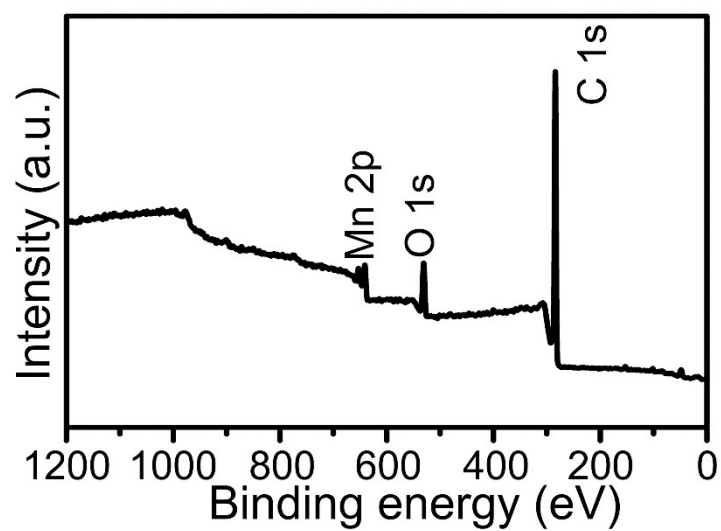

**Fig. S6** XPS survey spectrum of MnO@C microspheres.

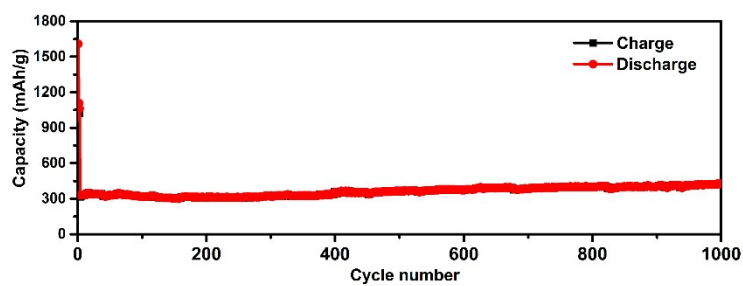

**Fig. S7** Cycling performance of MnO@C microsphere tested at 10 C for 1000 cycles.



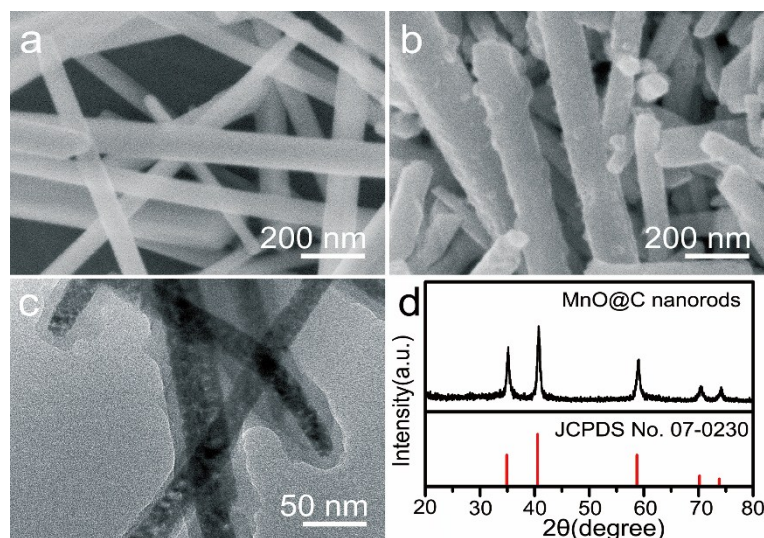

**Fig. S8** a) SEM images of  $\text{MnCO}_3$  nanorods. b-d) SEM image (b), TEM image (c) and XRD patterns (d) of  $\text{MnO@C}$  nanorods. The  $\text{MnCO}_3$  nanorods (Figure S5a) in a diameter of 70~140 nm were firstly synthesized through a hydrothermal route. The final product  $\text{MnO@C}$  nanorod has a diameter of 150~200 nm (Figure S5b) and an apparent carbon layer is in a thickness of 10~20 nm (Figure S5c). The XRD patterns (Figure S5d) can be also well-indexed to cubic MnO (JCPDS No. 07-0230).

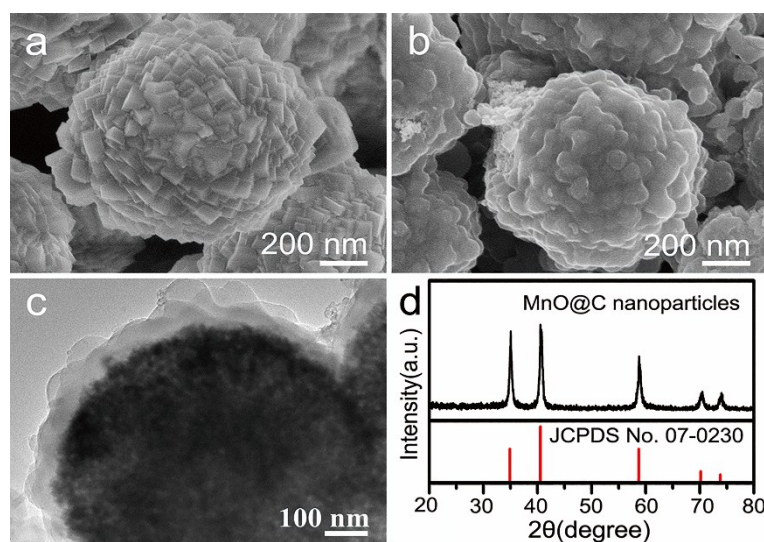

**Fig. S9** a) SEM images of  $\text{MnCO}_3$  nanoparticles. b-d) SEM image (b), TEM image (c) and XRD patterns (d) of  $\text{MnO@C}$  nanoparticles. The  $\text{MnCO}_3$  microsphere aggregated by nanoparticles was first prepared as show in Fig S6a. After coated by PDA and carbonized in an inert atmosphere, the  $\text{MnO@C}$  nanoparticles was obtained (Figure S6b). From the TEM image (Figure S6c), the carbon layer with a thickness of ~50 nm

could be obviously observed and the XRD pattern in Figure S6d further confirmed its structure information which could be indexed into the cubic MnO (JCPDS No. 07-0230).

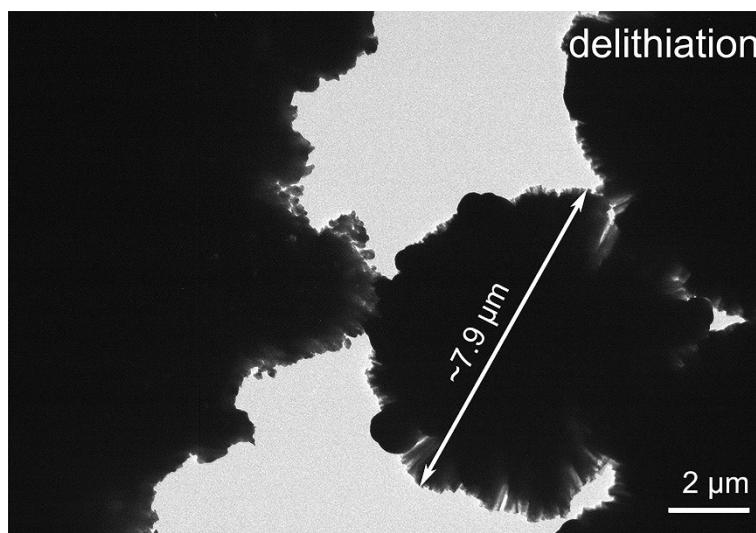

**Fig. S10** The TEM image of MnO@C hierarchical microsphere after lithiation.

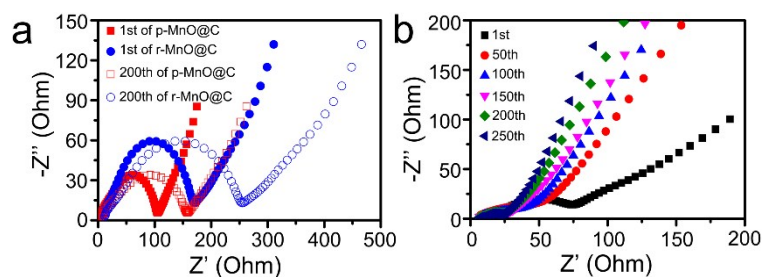

**Fig. S11** a) Nyquist plots of MnO@C nanorods and MnO@C nanoparticles. b) Nyquist plots of MnO@C microspheres in different cycles.

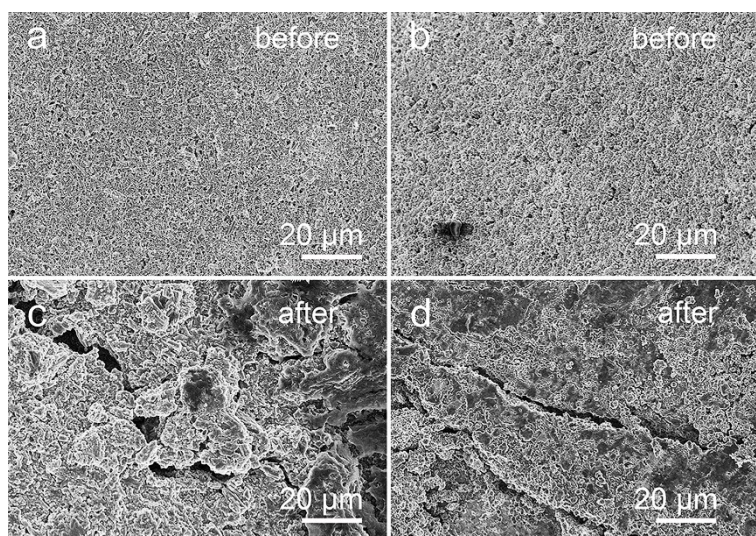

**Fig. S12** SEM images of the electrodes before cycles for MnO@C nanorods (a) and MnO@C nanoparticles (b), and after cycles for MnO@C nanorods (c) and MnO@C nanoparticles (d).

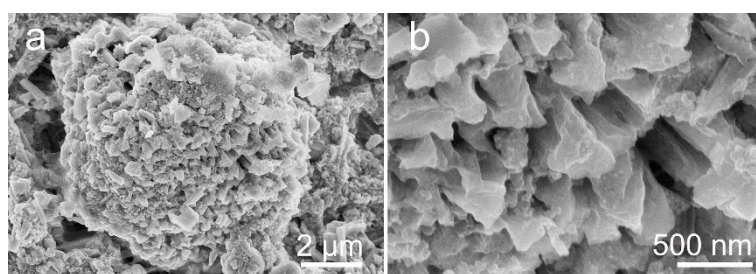

**Fig. S13** a) The low magnification and b) high magnification SEM images of MnO@C microspheres in the electrode after cycles.

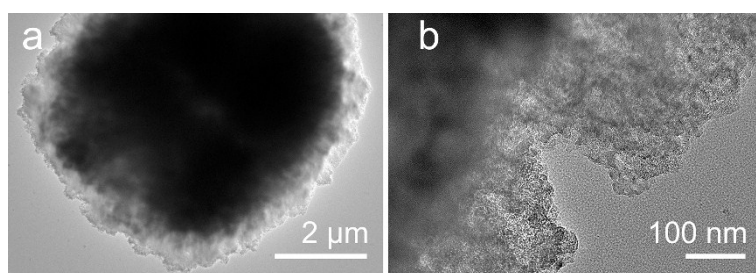

**Fig. S14** TEM images of MnO@C microsphere after 1000 cycles.

#### Reference:

- 1 F. C. Zheng, G. L. Xia, Y. Yang and Q. W. Chen, *Nanoscale*, 2015, **7**, 9637-9645.
- 2 C. X. Yang, Q. M. Gao, W. Q. Tian, Y. L. Tan, T. Zhang, K. Yang and L. H. Zhu, *J. Mater. Chem. A*, 2014, **2**, 19975-19982.
- 3 X. J. Jiang, W. Yu, H. Wang, H. Y. Xu, X. Z. Liu and Y. Ding, *J. Mater. Chem. A*,

2016, **4**, 920-925.

4 M. I. Zaki, M. A. Hasan, L. Pasupulety and K. Kumari, *Thermochim. Acta*, 1997, **303**, 171-181.

5 Y. Xia, Z. Xiao, X. Dou, H. Huang, X. H. Lu, R. J. Yan, Y. P. Gan, W. J. Zhu, J. P. Tu, W. K. Zhang and X. Y. Tao, *ACS Nano*, 2013, **7**, 7083-7092.

6 D. M. Kang, Q. L. Liu, R. Si, J. J. Gu, W. Zhang, D. Zhang, *Carbon*, 2016, **99**, 138-147.

7 F. C. Zheng, Z. C. Yin, H. Y. Xia, G. L. Bai and Y. G. Zhang, *Chem. Eng. J.*, 2017, **327**, 474-480.

8 D. Sun, Y. G. Tang, D. L. Ye, J. Yan, H. S. Zhou and H. Y. Wang, *ACS Appl. Mater. Interfaces*, 2017, **9**, 5254-5262.
